# Supplementary material for: miR-548aq-3p is a novel target of Far infrared radiation which predicts coronary artery disease endothelial colony forming cell responsiveness
Source: PubMed Central journal article supplement (PMC7176637; doi:10.1038/s41598-020-63311-1), 2020-04-22
Supplement: 41598_2020_63311_MOESM1_ESM.pdf [file 41598_2020_63311_MOESM1_ESM.pdf]

miR-548aq-3p is a novel target of Far infrared radiation which predicts coronary artery disease endothelial colony forming cell responsiveness

Wei-Che Tsai<sup>a,b\*</sup>, Wei-Hui Chiang<sup>b\*</sup>, Chun-Hsien Wu<sup>a,b</sup>, Yue-Cheng Li<sup>b</sup>, Mel Campbell<sup>c</sup>, Po-Hsun Huang<sup>d,e</sup>, Ming-Wei Lin<sup>f</sup>, Chi-Hung Lin<sup>b,g</sup>, Shu-Meng Cheng<sup>a</sup>, Pei-Ching Chang<sup>b,h‡</sup>, Cheng-Chung Cheng<sup>a‡</sup>

<sup>a</sup>Division of Cardiology, Department of Internal Medicine, Tri-Service General Hospital, National Defense Medical Center, Taipei, Taiwan

<sup>b</sup>Institute of Microbiology and Immunology, National Yang-Ming University, Taipei, Taiwan

<sup>c</sup>UC Davis Cancer Center, University of California, Davis, California, USA

<sup>d</sup>Cardiovascular Research Center, National Yang-Ming University, Taipei, Taiwan

<sup>e</sup>Division of Cardiology, Department of Medicine, Taipei Veterans General Hospital and Institute of Clinical Medicine, Taipei, Taiwan.

<sup>f</sup>Institute of Public Health, National Yang-Ming University, Taipei 112, Taiwan

<sup>g</sup>Institute of Clinical Medicine, National Yang Ming University, Taipei, Taiwan

<sup>h</sup>Cancer Progression Research Center, National Yang-Ming University, Taipei, Taiwan

<sup>‡</sup>Corresponding author

\*First author

‡Corresponding author: Pei-Ching Chang and Cheng-Chung Cheng

Address correspondence to: Pei-Ching Chang

Institute of Microbiology and Immunology, National Yang-Ming University, Taipei 11221, Taiwan. Phone: +886-2-2826-7111; E-mail: [pcchang@ym.edu.tw](mailto:pcchang@ym.edu.tw)

Address correspondence to: Cheng-Chung Cheng

Division of Cardiology, Department of Internal Medicine, Tri-Service General Hospital, National Defense Medical Center, Taipei, Taiwan. Phone: +886-2-87923311 ext12837; Fax: +886-2-66012656 Email: [chengcc@ndmctsg.h.edu.tw](mailto:chengcc@ndmctsg.h.edu.tw)

**Short Title:** miR-548aq-3p in CAD ECFCs responsiveness to FIR

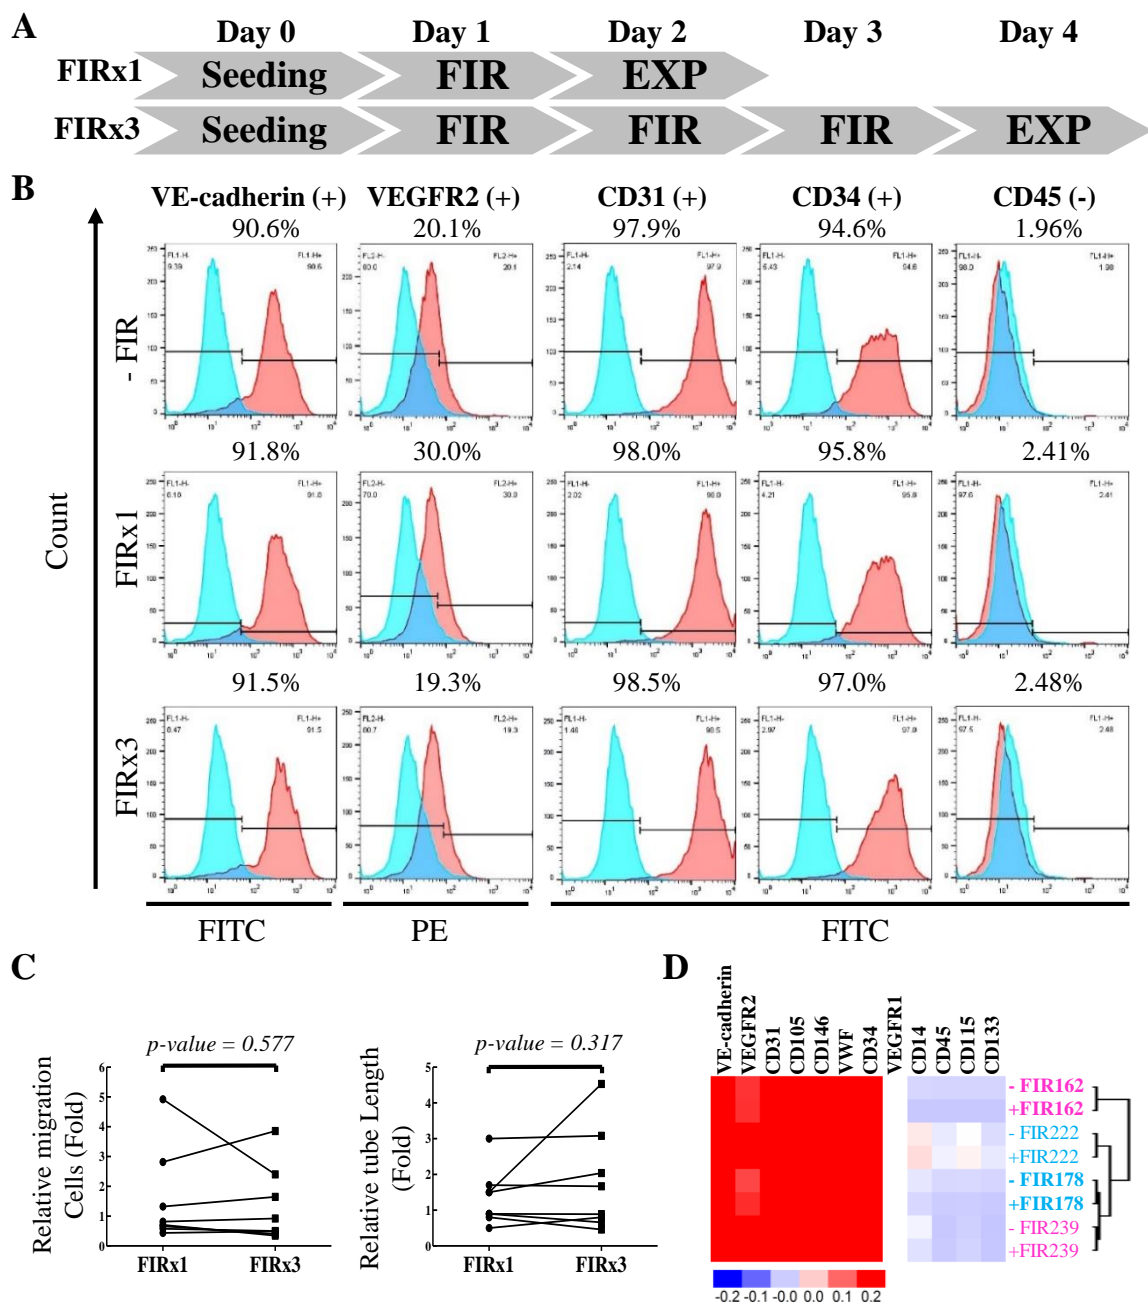

**Figure S1.** Repeated FIR treatment does not further improve the function of CAD ECFCs. (A) Schematic of CAD ECFCs treated with one (FIRx1) or three (FIRx3) cycles of FIR. (B) Immunophenotyping of ECFCs as described in Figure 1A. Representative flow cytometry plot of CAD ECFCs before and after one or three FIR treatments. (C) Statistical analysis of migrated cell number (left panel) and tube length (right panel) of CAD ECFCs after one or three FIR treatments relative to control un-treated ECFCs. ( $n=8$ , Paired *Student's-t* test). (D) Heatmap showed the expression of endothelial markers VE-cadherin, VEGFR2, VEGFR1, CD31, CD34, CD105, CD146, VWF and hematopoietic markers in FIR-responsive and FIR-unresponsive male and female CAD ECFCs before and after FIR treatment.

**A**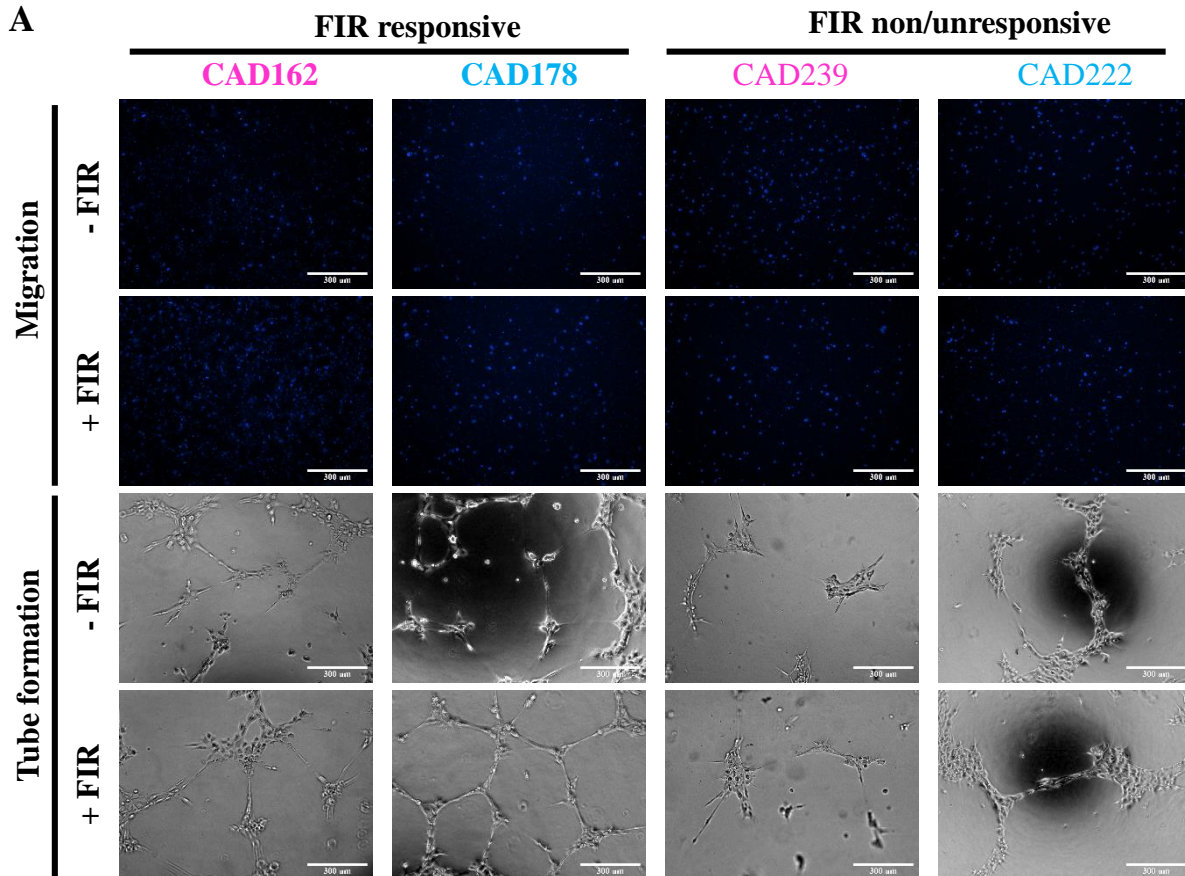**B**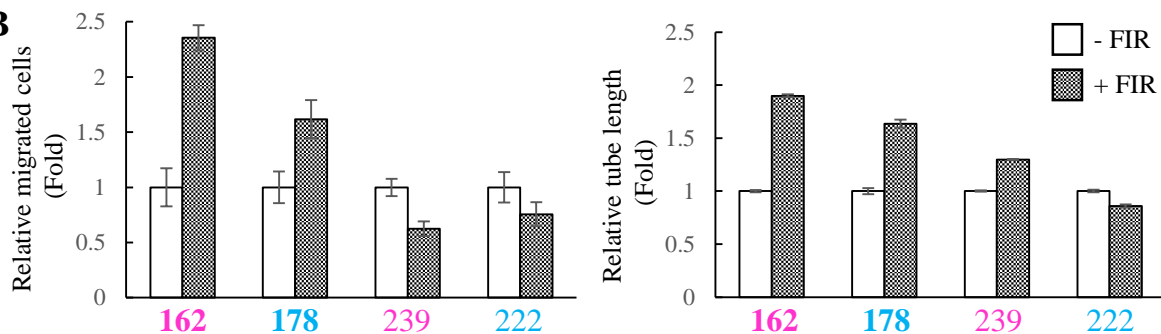

**Figure S2.** Mobility and microvasculature formation of 2 FIR-responsive and 2 FIR-unresponsive CAD ECFCs used for RNA-seq analysis. (A) Representative microscopic images showing the migrated cells in the lower transwell chamber (upper panel) and tube formation on BME (lower panel) of CAD ECFCs before and after FIR treatment (original magnification 10x, scale bar 400 μm). (B) Quantitative data of relative tube length (upper panel) and migrated cell number (lower panel).

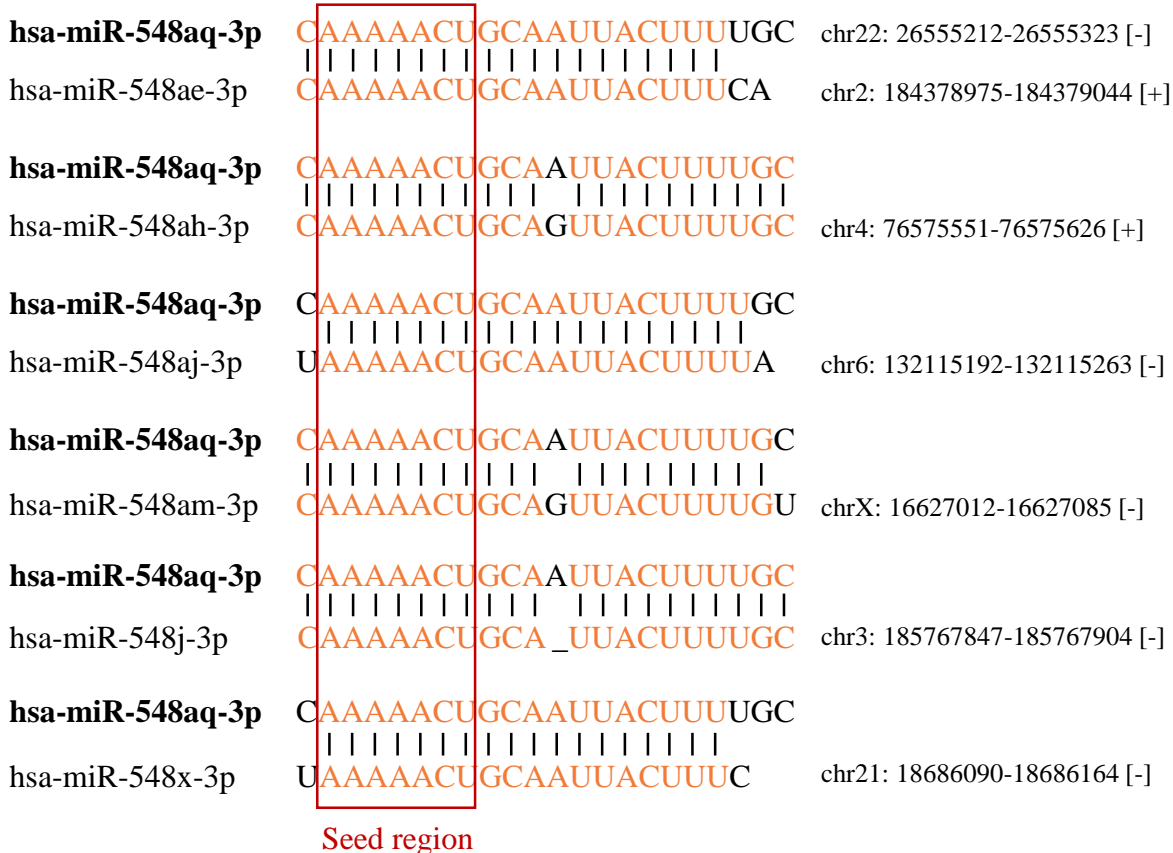

**Figure S3.** Sequence alignment of miR-548aq-3p with the other miR-548 family members showing the identical seed region.

**Table S1 miRCURY LNA miRNA primer list**

| Brand  | Name             | Cat. No.   |
|--------|------------------|------------|
|        | hsa-miR-188-3p   | YP02119296 |
|        | hsa-miR-224-5p   | YP00204641 |
|        | hsa-miR-4326     | YP02103754 |
|        | hsa-miR-452-5p   | YP00204301 |
| QIAGEN | hsa-miR-4662a-5p | YP02115325 |
|        | hsa-miR-4746-5p  | YP02113549 |
|        | hsa-miR-5010-3p  | YP02109984 |
|        | hsa-miR-550a-3p  | YP00204795 |
|        | hsa-miR-548aq-3p | YP02100851 |

**Table S2 The expression levels of endothelial and hematopoietic markers in CAD ECFCs**

| Marker      | CAD ECFCs |        |        |        |         |        |        |        | Colony forming unit – Hill | Circulating angiogenic cell | Endothelial colony forming cell |
|-------------|-----------|--------|--------|--------|---------|--------|--------|--------|----------------------------|-----------------------------|---------------------------------|
|             | (-) FIR   |        |        |        | (+) FIR |        |        |        |                            |                             |                                 |
|             | 162       | 178    | 239    | 222    | 162     | 178    | 239    | 222    |                            |                             |                                 |
| VE-cadherin | 296.95    | 297.09 | 301.37 | 241.52 | 281.73  | 302.24 | 295.37 | 266.36 | +/-                        | +/-                         | ++                              |
| VEGFR2      | 49.04     | 48.98  | 95.74  | 47.73  | 48.13   | 53.36  | 79.05  | 54.57  | +                          | +                           | ++                              |
| CD31        | 433.31    | 270.61 | 251.55 | 307.60 | 395.38  | 248.35 | 316.90 | 266.23 | +                          | +                           | +                               |
| CD105       | 352.42    | 346.29 | 266.37 | 230.65 | 350.25  | 345.55 | 279.64 | 242.86 | +                          | +                           | +                               |
| CD146       | 710.68    | 959.94 | 672.02 | 628.69 | 637.99  | 888.10 | 705.94 | 623.38 | +/-                        | +/-                         | +                               |
| VWF         | 196.64    | 188.17 | 410.96 | 136.27 | 174.39  | 184.52 | 369.12 | 163.30 | +/-                        | +/-                         | +                               |
| CD34        | 576.37    | 171.69 | 248.35 | 67.30  | 551.77  | 181.63 | 282.41 | 65.52  | +/-                        | +/-                         | +/-                             |
| VEGFR1      | 8.53      | 9.08   | 5.97   | 8.72   | 10.17   | 10.93  | 4.13   | 8.27   | +                          | +                           | +                               |
| CD14        | 0.35      | 3.63   | 9.76   | 7.00   | 0.04    | 2.92   | 10.27  | 3.73   | +                          | +                           | -                               |
| CD45        | 0.01      | 0.78   | 2.35   | 0.62   | 0.07    | 0.78   | 1.72   | 0.58   | +/-                        | +/-                         | -                               |
| CD115       | 0.01      | 0.80   | 5.74   | 1.75   | 0.01    | 0.94   | 6.42   | 1.89   | +                          | +                           | -                               |
| CD133       | 0.01      | 0.13   | 0.20   | 0.07   | 0.01    | 0.03   | 0.11   | 0.01   | +                          | +                           | -                               |

**Table S3 Primer sequences for RT-qPCR used in this study**

| Gene    | Forward primer (5'-3') | Reverse primer (5'-3') |
|---------|------------------------|------------------------|
| ERN1    | GCGAACAGAATACACCATCAC  | GCATCACCTTCCTCAGACC    |
| FRS2    | TGTCCCAGATAACCATCGG    | GGCAAAGATTCCTTGTCCA    |
| ITGAV   | ACAATGAAGCCTTAGCAAGAC  | GCACACTGAAACGAAGACC    |
| KLF7    | GTGAGCCAGACAGACTGAC    | ATTCAAGGCATGTCTGCTGC   |
| MGAT5   | TGTGGCAGATATCATTAAACGG | TCTGTACGAATTTCCGCCA    |
| NF1     | TCCTGCTCTGTATCCAATGCT  | CACACGAACATACCTGACCA   |
| PRKAA1  | AGCCGAGAAGCAGAAACAC    | TTCATGTTTGCCAACCTTCAC  |
| PRKACB  | GGACCTTCTACGGAACCTG    | GGAGCTTCAACCTTCCTCTG   |
| RGS4    | AGTCATGAATGTGGGCTGG    | GGAATCCTTCTCCATCAGGT   |
| ROCK2   | GACACAAACAGGAACTTACGG  | TCTCAGCCAACTTATTCACAG  |
| TBX20   | ATTGAGAGGGAAAGTGTGGA   | GGAATGGGTGTTGCTATGG    |
| ATP11A  | TCTACAACATCAGCTTCACCT  | AGTTTCCAAATATCTGCCCCGT |
| BHLHB9  | ATGTTAAGGAGCTCAAGAAGC  | TCTCTTTCCAAACATACAGCC  |
| BTBD9   | TGCCAGTGTGATTGAAGGA    | AGTAGTAACCGTATTGACCCA  |
| CCDC103 | CATCACATCTGAAGCCACTG   | GAAGTCCAAATCCCACATCTG  |
| CYLD    | CAAGTCCACCTTCATCCGA    | ATTCTGACCACCATCCCGA    |
| DPY19L3 | GGACCAGAGCGGTTTATCAG   | GATCTCTTCACAGAAGCGAGG  |
| DSTYK   | CTGTTGAATCTGCTGTTGGG   | AACGTCCACTTCCTGTAAGAG  |
| FIGNL1  | GCAGATGATAGAGCCAGGA    | GATGCTGCTATCTCAGTACCA  |
| FKTN    | TTTGACAGGCCAGAGTTACAG  | ACCATCCTAGACAAGTTCCAC  |
| MECOM   | CCCAGTGAGGTATAAAGAGGA  | CTGCGATTTGGACTTTCTGTG  |
| PEX26   | ACCTTCCAGAATATGGAGCCT  | AGGAACTTGTGGGAGACAGAG  |
| PHF7    | GCAGCCACAGACTACATAACC  | ATTCTGACACCCTTGGACCT   |
| PHF8    | CAAGGAAAGAAGCTCTGCCA   | ACTGAAGTGGAATGGGCTG    |
| RBBP8   | TCAGCCCTTGAATAAATGCTC  | AGAACCAGCACTCTTTATGTC  |
| SLC7A2  | GATTCCTAGCTTTCCTCGTG   | CCATCCAAATGCTGAATCTGAC |
| SMC2    | ATCAGCAAACATAAACGGGAG  | AGTCATTGTATCGCTCTTCAG  |
| SPAST   | TACTATTTCTCCTACCCGCTG  | CTCCTTCTGTCCTGCTTTCTC  |
| STIM2   | GACACTTCCCAGGATAGCAG   | GTATAAGCAAACCAGCAGCC   |
| TLK1    | AAACTACCACAAACATGCCT   | AATCCAAGTCATTGCCTTCAC  |
| WDHD1   | GCAGCATTACAATCTACCA    | GAGTTCCACACCATGAATCTG  |
| XIAP    | TCGAAGTGAATCTGATGCTG   | GATATTTGCACCCTGGATAACC |
| ZBTB16  | CTCACATACAGGCGACCAC    | CACCCTATAGTGCGTCTCCA   |
| ZNF93   | CTACTCTGTGTCCTGTGCT    | CAACAATACCAAGGAAGACCA  |
